# Supplementary material for: Secondary Degeneration Impairs Myelin Ultrastructural Development in Adulthood following Adolescent Neurotrauma in the Rat Optic Nerve
Source: MDPI journal article supplement (doi:10.3390/ijms24043343), 2023-02-07
Supplement: s1 [file s1]

**Table S1.** All 2-way ANOVA Results.

| <b>Myelin Classifications</b>                              |                                    |                                     |                                    |               |
|------------------------------------------------------------|------------------------------------|-------------------------------------|------------------------------------|---------------|
| <b>Measurement</b>                                         | <b>Age (Main effect)</b>           | <b>Injury (Main Effect)</b>         | <b>Interaction Effect</b>          | <b>Figure</b> |
| Axons with Compact Myelin (%)                              | $F_{(1,16)} = 27.36, p < 0.0001$   | $F_{(1,16)} = 2.388, p = 0.1418$    | $F_{(1,16)} = 3.912, p = 0.0654$   | 3a            |
| Axons with moderately decompacted myelin (%)               | $F_{(1,16)} = 16.20, p = 0.0010$   | $F_{(1,16)} = 0.4280, p = 0.5223$   | $F_{(1,16)} = 0.3559, p = 0.5592$  | 3b            |
| Axons with severely decompacted myelin (%)                 | $F_{(1,16)} = 66.91, p < 0.0001$   | $F_{(1,16)} = 4.100, p = 0.0599$    | $F_{(1,16)} = 10.80, p = 0.0046$   | 3c            |
| Unmyelinated axons (%)                                     | $F_{(1,16)} = 5.871, p = 0.0276$   | $F_{(1,16)} = 0.4292, p = 0.5217$   | $F_{(1,16)} = 0.1694, p = 0.6861$  | 3d            |
| <b>Morphology of Axons with Compact Myelin</b>             |                                    |                                     |                                    |               |
| <b>Measurement</b>                                         | <b>Age (Main effect)</b>           | <b>Injury (Main Effect)</b>         | <b>Interaction Effect</b>          | <b>Figure</b> |
| Myelin Thickness ( $\mu\text{m}$ )                         | $F_{(1,16)} = 21.05, p = 0.0003$   | $F_{(1,16)} = 0.001438, p = 0.9702$ | $F_{(1,16)} = 8.525, p = 0.0100$   | 4a            |
| Axon Diameter ( $\mu\text{m}$ )                            | $F_{(1,16)} = 1.627, p = 0.2204$   | $F_{(1,16)} = 0.1320, p = 0.7211$   | $F_{(1,16)} = 0.001, p = 0.9904$   | 4b            |
| Fibre Diameter ( $\mu\text{m}$ )                           | $F_{(1,16)} = 2.793, p = 0.1141$   | $F_{(1,16)} = 0.04561, p = 0.8336$  | $F_{(1,16)} = 0.1746, p = 0.6816$  | 4c            |
| G Ratio                                                    | $F_{(1,16)} = 0.3602, p = 0.5568$  | $F_{(1,16)} = 0.07953, p = 0.7815$  | $F_{(1,16)} = 1.130, p = 0.3036$   | 4d            |
| <b>Diameter of Axons with Decompacted Myelin</b>           |                                    |                                     |                                    |               |
| <b>Measurement</b>                                         | <b>Age (Main effect)</b>           | <b>Injury (Main Effect)</b>         | <b>Interaction Effect</b>          | <b>Figure</b> |
| Axons with Moderately Decompacted Myelin ( $\mu\text{m}$ ) | $F_{(1,16)} = 6.096, p = 0.0252$   | $F_{(1,16)} = 2.703, p = 0.1196$    | $F_{(1,16)} = 0.07367, p = 0.7895$ | 4e            |
| Axons with Severely Decompacted Myelin ( $\mu\text{m}$ )   | $F_{(1,16)} = 1.807, p = 0.1977$   | $F_{(1,16)} = 2.191, p = 0.1582$    | $F_{(1,16)} = 0.7760, p = 0.3914$  | 4f            |
| Axons with Completely Decompacted Myelin ( $\mu\text{m}$ ) | $F_{(1,14)} = 0.1275, p = 0.7264$  | $F_{(1,14)} = 0.5569, p = 0.4679$   | $F_{(1,14)} = 2.709, p = 0.1220$   | 4g            |
| Unmyelinated Axons ( $\mu\text{m}$ )                       | $F_{(1,13)} = 0.02401, p = 0.8792$ | $F_{(1,13)} = 4.47, p = 0.0542$     | $F_{(1,13)} = 0.1578, p = 0.6977$  | 4h            |
| <b>Population Analyses</b>                                 |                                    |                                     |                                    |               |
| <b>Measurement</b>                                         | <b>Age (Main effect)</b>           | <b>Injury (Main Effect)</b>         | <b>Interaction Effect</b>          | <b>Figure</b> |
| Median Diameter of Axons with Compact Myelin               | $F_{(1,16)} = 1.059, p = 0.3186$   | $F_{(1,16)} = 0.1351, p = 0.7180$   | $F_{(1,16)} = 0.7784, p = 0.3907$  | 5e            |
| Median Diameter of Axons with Decompacted Myelin           | $F_{(1,16)} = 1.247, p = 0.2807$   | $F_{(1,16)} = 1.086, p = 0.3129$    | $F_{(1,16)} = 0.0886, p = 0.7697$  | 5f            |
